# Supplementary material for: Selective colorimetric sensing of sub-nanomolar Hg2+ based on its significantly enhancing peroxidase mimics of silver/copper nanoclusters
Source: Royal Society of Chemistry journal article supplement (doi:10.1039/d1an00512j), 2021-01-01
Supplement: d1an00512j1.pdf [file d1an00512j1.pdf]

## Electronic Supplementary Information

### **Selective colorimetric sensing sub-nanomolar Hg<sup>2+</sup> based on its significantly enhancing peroxidase mimics of silver/copper nanoclusters**

Yuanyuan Cai<sup>a</sup>, Jin Wang<sup>b</sup>, Lingxi Niu<sup>a</sup>, Yujiao Zhang<sup>a</sup>, Xuan Liu<sup>a</sup>, Chongyang Liu<sup>a</sup>,  
Shuqing Yang<sup>a</sup>, Huan Qi<sup>c\*</sup> and Aihua Liu<sup>a\*</sup>

<sup>a</sup>School of Pharmacy, Medical College, and Institute for Chemical Biology & Biosensing, and College of Life Sciences, Qingdao University, 308 Ningxia Road, Qingdao 266071, China

<sup>b</sup>Qingdao Institute for Food and Drug Control, 7 Longde Road, Qingdao 266073, China

<sup>c</sup>Shanghai Center for Systems Biomedicine, Key Laboratory of Systems Biomedicine (Ministry of Education), Shanghai Jiao Tong University, Shanghai 200240, China

\*Corresponding authors. E-mails: liuah@qdu.edu.cn; qihuan@sjtu.edu.cn.

## 1. Supplementary figures:

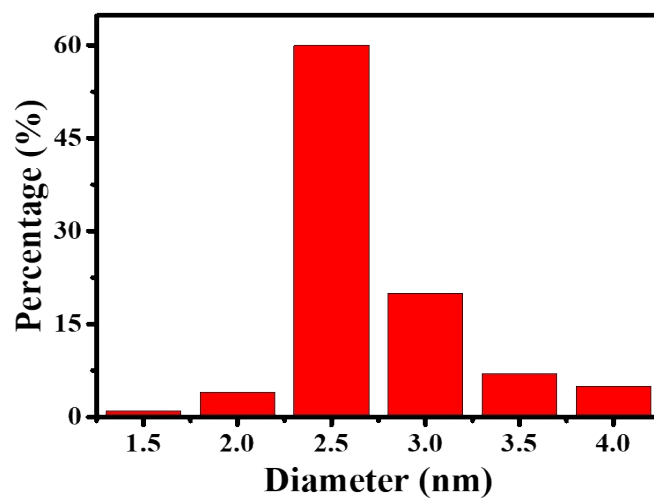

**Fig S1.** The size distribution of Ag/Cu NCs (the reaction molar ratio of Ag<sup>+</sup> to Cu<sup>2+</sup> is 1/0.5).

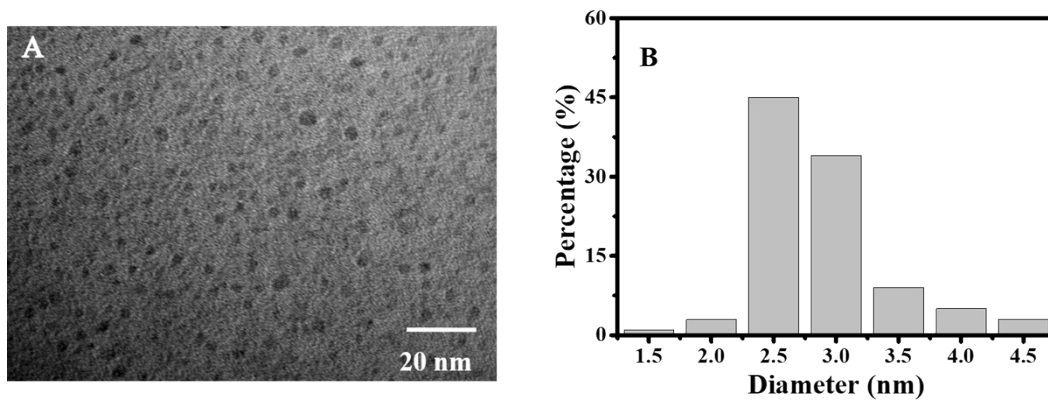

**Fig S2.** (A) TEM image and (B) the size distribution of the Ag/Cu NCs with  $\text{Hg}^{2+}$  ( $\text{Hg}^{2+}$  concentration, 700 nM).

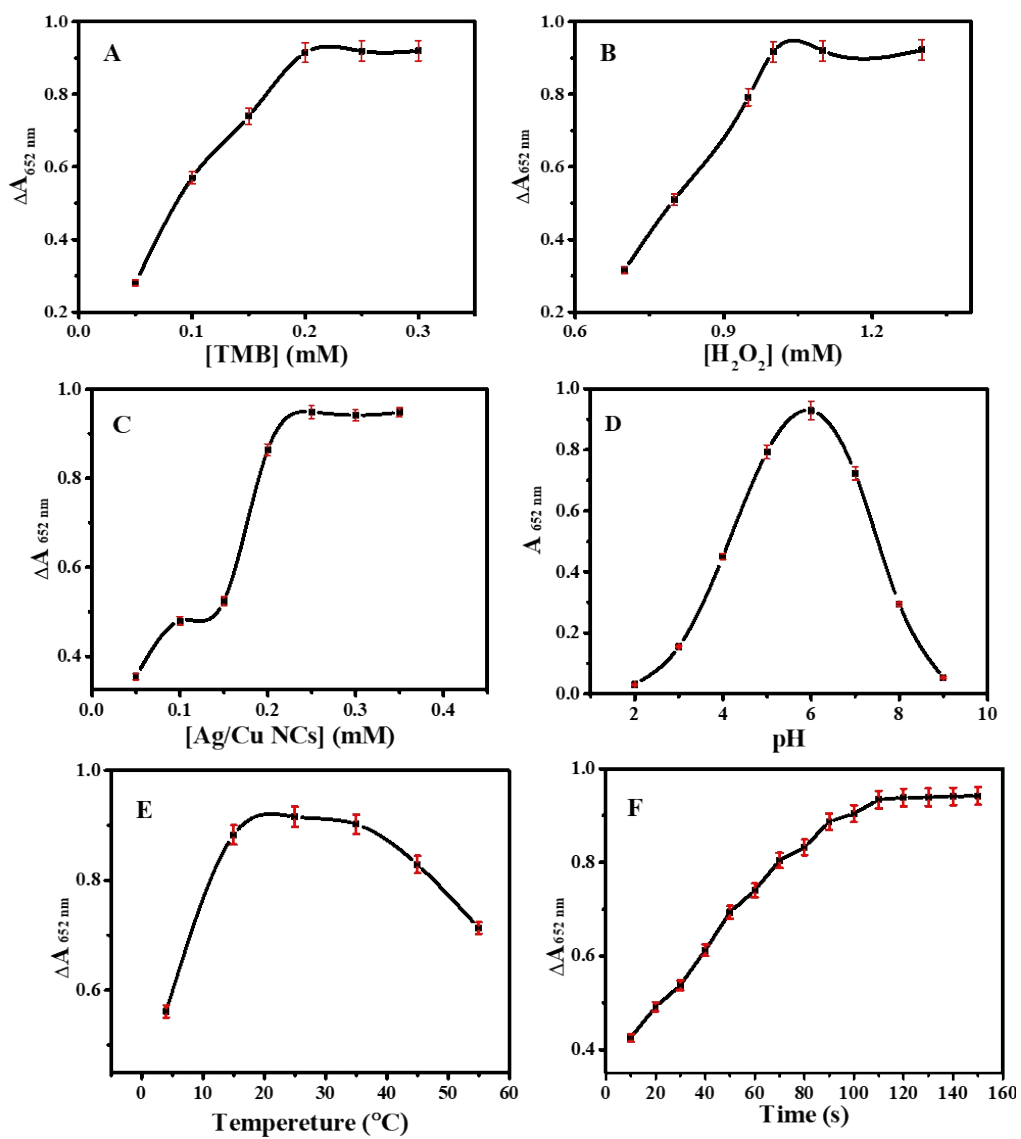

**Fig. S3** Effect of the concentration of (A) TMB, (B)  $\text{H}_2\text{O}_2$ , and (C) Ag/Cu NCs dosages, (D) pH, (E) temperature, and (F) response time on Ag/Cu NCs  $\text{Hg}^{2+}$  (Ag/Cu NCs and  $\text{Hg}^{2+}$  ions concentration, 0.25 mM and 700 nM, respectively).

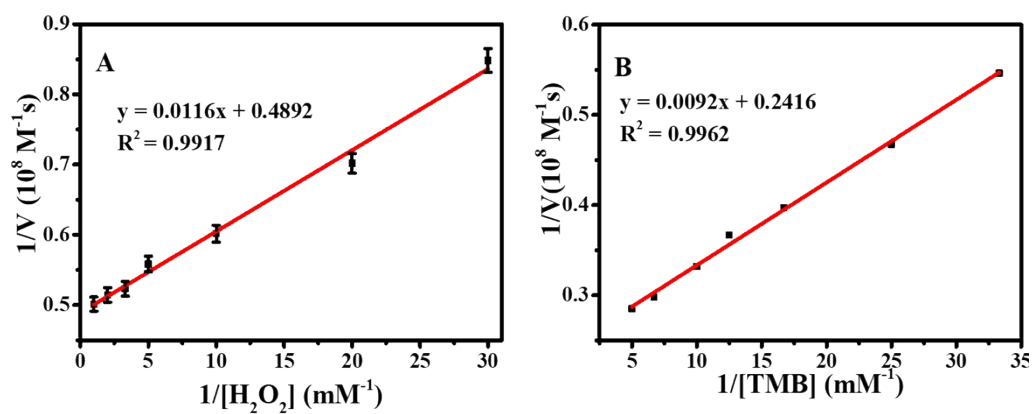

**Fig. S4** Steady-state kinetic analyses using the Lineweaver–Burk model for Hg<sup>2+</sup>-Ag/Cu NCs (0.25 mM) (A) by changing H<sub>2</sub>O<sub>2</sub> concentration and fixed TMB concentration (0.2 mM), (B) changing TMB concentration and fixed H<sub>2</sub>O<sub>2</sub> concentration (1.0 mM).

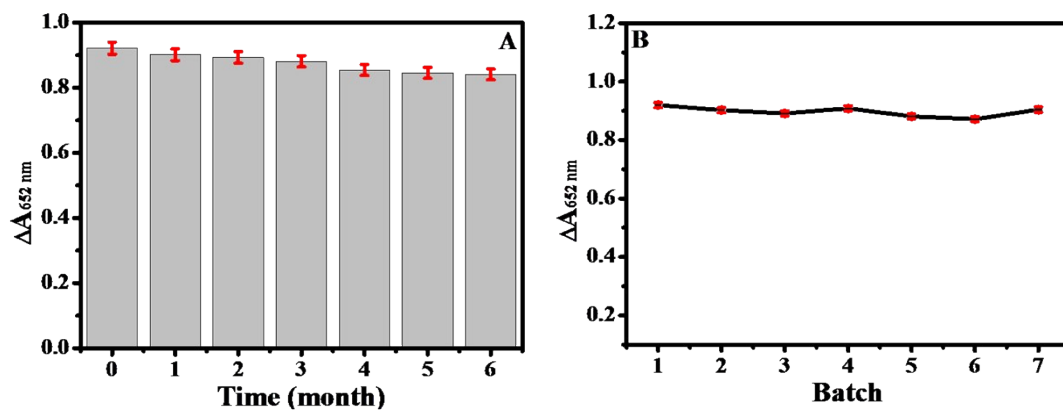

**Fig. S5** The storage stability (A) and reproducibility (B) of Ag/Cu NCs for the colorimetric  $\text{Hg}^{2+}$  analysis.

## 2. Supplementary table:

**Table S1.** Comparison of analytical performance for Hg<sup>2+</sup> ions based on different nanomaterials

| Nanomaterial                                    | Analysis method | Linear range (nM) | LOD (nM) | References |
|-------------------------------------------------|-----------------|-------------------|----------|------------|
| N-CQDs                                          | Fluorimetry     | 0.0–50000         | 250      | 1          |
| aptasensor                                      | Fluorimetry     | 10–9000           | 7.7      | 2          |
| polypyrrole decorated<br>graphene/-cyclodextrin | Electroanalysis | 1.0–51560         | 0.47     | 3          |
| PEG-SH/SePs/AuNPs                               | Electroanalysis | 70–17500          | 5.0      | 4          |
| Au NPs                                          | Colorimetry     | 10–20000          | 10       | 5          |
| Cu NPs                                          | Colorimetry     | 500–3500          | 43       | 6          |
| Ag/Cu NCs                                       | Colorimetry     | 0.1–700           | 0.05     | This work  |

### References

1. R. Zhang and W. Chen, *Biosens. Bioelectron.*, 2014, **55**, 83-90.
2. X. Song, B. Fu, Y. Lan, Y. Chen, Y. Wei and C. Dong, *Spectrochim Acta A*, 2018, **204**, 301.
3. S. Palanisamy, K. Thangavelu, S. M. Chen, V. Velusamy, M. H. Chang, T. W. Chen, F. M. A. Al-Hemaid, M. A. Ali and S. K. Ramaraj, *Sens. Actuators B Chem.*, 2017, **B243**, 888-894.
4. M. P. N. Bui, J. Brockgreitens, S. Ahmed and A. Abbas, *Biosens. Bioelectron.*, 2016, **85**, 280-286.
5. D. Su, X. Yang, Q. Xia, F. Chai and F. Qu, *Rsc Advances*, 2013, **3**, 24618.
6. R. A. Soomro, A. Nafady, Sirajuddin, N. Memon, T. H. Sherazi and N. H. Kalwar, *Talanta*, 2014, **130**, 415-422.
